# Supplementary material
Source: PubMed Central journal article supplement (PMC3574930)
Supplement: 1222796110_pnas.201222796SI.pdf [file 1222796110_pnas.201222796SI.pdf]

# Supporting Information

Gulati et al. 10.1073/pnas.1222796110

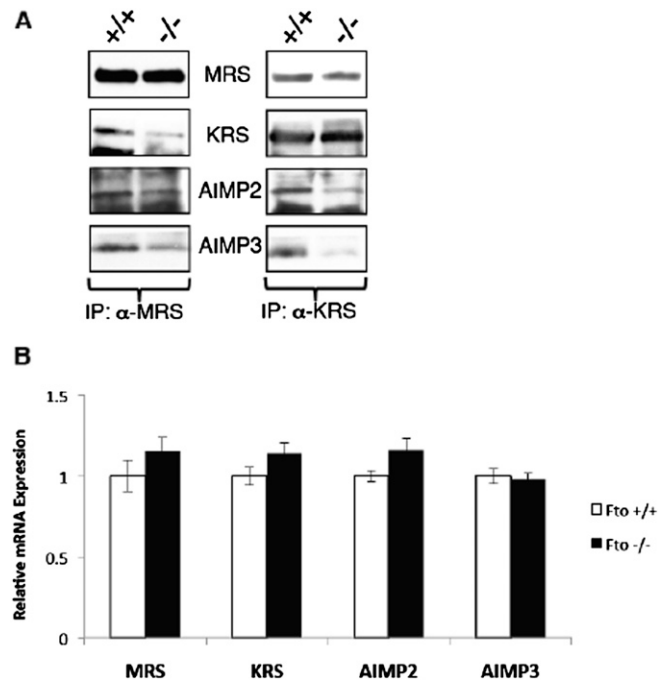

**Fig. S1.** *Fto*<sup>-/-</sup> mouse embryonic fibroblasts (MEFs) have perturbed multi-tRNA synthetase complex levels at protein level but not at mRNA level. (A) Methionyl-tRNA synthetase (MRS) and lysyl-tRNA synthetase (KRS) were immunoprecipitated from cell extracts of *Fto*<sup>+/+</sup> and *Fto*<sup>-/-</sup> MEFs using antibodies against MRS and KRS as explained in Fig. 3B. Resulting immunoprecipitates were analyzed for components of multi-tRNA synthetase complex by Western blotting using indicated antibodies. (B) mRNA from *Fto*<sup>+/+</sup> and *Fto*<sup>-/-</sup> MEFs was used for quantitative RT-PCR analysis of genes indicated. The graph shows the fold change expression of MRS, KRS, AIMP2, and AIMP3 genes in *Fto*<sup>+/+</sup> and *Fto*<sup>-/-</sup> MEFs, respectively. All data are expressed as mean  $\pm$  SEM.

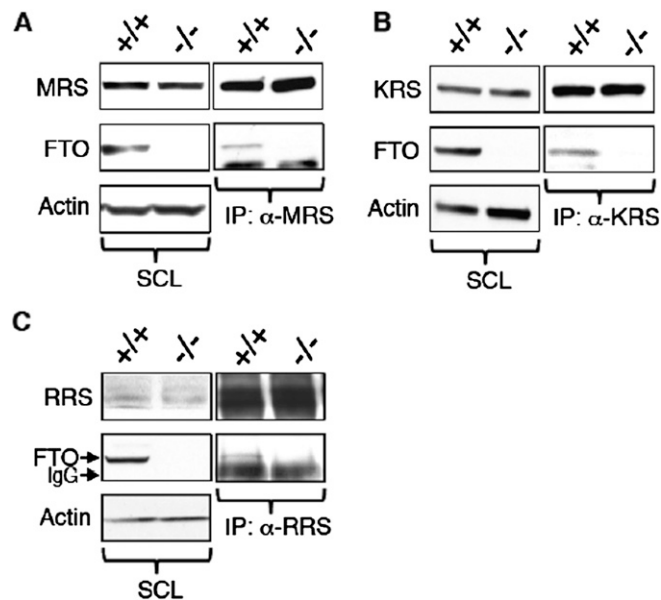

**Fig. S2.** Interaction of FTO with members of aminoacyl-tRNA synthetase family. MRS (A), KRS (B), and RRS (C) immunoprecipitation was performed in a similar manner as explained in Fig. 3B.

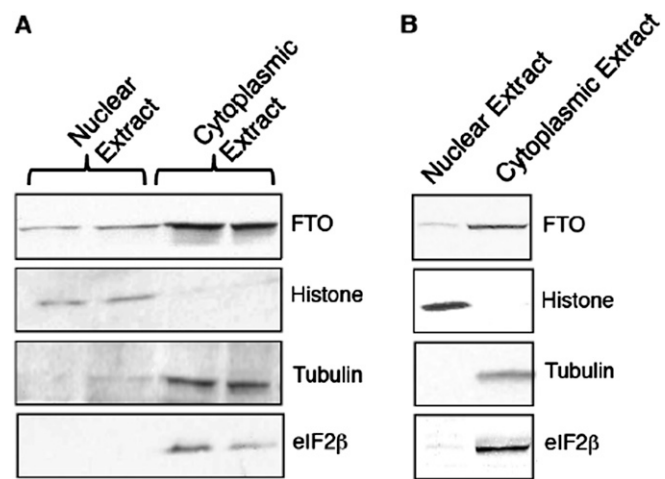

**Fig. S3.** Cytoplasmic localization of FTO in different cell lines. Extracts derived from mouse pancreatic  $\beta$ -cell line (lysed by detergent) (A) and hypothalamic N46 cells (lysed by mechanical breakage) (B) were subjected to subcellular fractionation using the compartmental protein extraction kit from Millipore per manufacturer instructions.
